# Supplementary material
Source: HighWire-hosted journal article supplement (https://jnm.snmjournals.org/highwire/filestream/94027/field_highwire_adjunct_files/0/53421_Supplemental_Table_1.pdf)
Supplement: 53421_Supplemental_Table_1.pdf [file 53421_Supplemental_Table_1.pdf]

**Supplemental Table 1.** Patient Characteristics

| Patient No. | Sex | Age (y) | Pathology              | Findings                | Therapy | TCD (GBq /Cycles) | Interval (d) | SUV Pre-therapy (g/ml) | SUV Post-therapy (g/ml) | Results |
|-------------|-----|---------|------------------------|-------------------------|---------|-------------------|--------------|------------------------|-------------------------|---------|
| 1           | m   | 52      | NET of pancreas        | liver, bone             | Y-90    | 13.4 / 4          | 90           | 71.2                   | 60.1                    | MR      |
| 2           | m   | 84      | NET of colon           | liver, bone, lymph node | Lu-177  | 6 / 3             | 38           | 30.2                   | 34.2                    | SD      |
| 3           | m   | 63      | NET of small bowel     | liver, lymph node       | Y-90    | 6.13 / 3          | 57           | 22.8                   | 14.0                    | SD      |
| 4           | m   | 61      | NET unknown<br>primary | liver, bone             | Lu-177  | 34.86 / 6         | 75           | 38.5                   | 18.9                    | SD      |
| 5           | m   | 61      | NET of pancreas        | liver                   | Y-90    | 21.4 / 6          | 92           | 34.3                   | 60.9                    | SD      |
| 6           | m   | 59      | Gastrinoma             | liver, bone             | Y-90    | 14.75 / 4         | 60           | 43.5                   | 37.6                    | PD      |

|    |   |    |                    |                         |          |            |     |      |      |    |
|----|---|----|--------------------|-------------------------|----------|------------|-----|------|------|----|
| 7  | m | 48 | NET of pancreas    | liver, lymph node       | Y-90     | 6.2 / 2    | 59  | 23.3 | 23.9 | PD |
| 8  | f | 55 | NET of pancreas    | liver, lymph node       | Lu-177   | 29.3 / 4   | 71  | 54.8 | 7.7  | PR |
| 9  | m | 81 | NET of pancreas    | liver, bone, lymph node | Lu-177   | 35.5 / 4   | 117 | 94.0 | 18.0 | PD |
| 10 | f | 41 | NET of pancreas    | liver, lymph node       | Y-90     | 12.79 / 4  | 111 | 9.8  | 5.0  | SD |
| 11 | f | 59 | NET of small bowel | liver                   | Y-90     | 6 / 2      | 55  | 20.8 | 20.0 | PD |
| 12 | m | 57 | NET of small bowel | liver, bone, lymph node | Lu-177   | 14.8 / 3   | 59  | 26.5 | 29.3 | SD |
| 13 | m | 47 | NET of small bowel | liver                   | Lu-177   | 14.2 / 4   | 109 | 23.9 | 27.7 | SD |
| 14 | f | 76 | Gastrinoma         | liver, bone, lymph node | Y-90     | 10.1 / 5   | 116 | 41.6 | 29.1 | PD |
|    |   |    |                    |                         | Y-90+Lu- | 13.1+5.8 / |     |      |      |    |
| 15 | f | 73 | NET of pancreas    | liver, lymph node       | 177      | 6+1        | 118 | 66.0 | 16.3 | PR |
| 16 | m | 64 | NET of pancreas    | liver                   | Y-90     | 14.4 / 4   | 95  | 98.3 | 68.9 | PR |

|    |   |    |                    |                    |          |               |    |      |      |    |
|----|---|----|--------------------|--------------------|----------|---------------|----|------|------|----|
| 17 | m | 34 | NET of pancreas    | liver, lymph node  | Y-90     | 12.3 / 4      | 87 | 33.4 | 29.4 | PD |
|    |   |    | NET unknown        |                    |          |               |    |      |      |    |
| 18 | f | 52 | primary            | liver              | Y-90     | 12 / 6        | 57 | 33.5 | 43.3 | SD |
| 19 | f | 78 | NET of small bowel | liver              | Lu-177   | 27 / 4        | 34 | 18.9 | 17.7 | PR |
|    |   |    |                    |                    | Y-90+Lu- |               |    |      |      |    |
| 20 | f | 57 | NET of small bowel | liver, bone        | 177      | 8.1+2.1 / 4+1 | 88 | 29.9 | 19.2 | PD |
| 21 | m | 73 | Glomus tumor       | neck               | Lu-177   | 26.4 / 4      | 74 | 35.1 | 46.9 | SD |
|    |   |    | NET of radix       |                    |          |               |    |      |      |    |
| 22 | m | 50 | mesenterica        | liver, lymph node  | Lu-177   | 30.15 / 4     | 90 | 14.6 | 18.1 | SD |
| 23 | m | 74 | NET of lung        | bone, lymph node   | Y-90     | 14.96 / 4     | 97 | 29.0 | 6.4  | SD |
| 24 | f | 61 | NET of lung        | liver, lung, heart | Y-90     | 13.3 / 4      | 90 | 64.2 | 48.2 | SD |
| 25 | m | 74 | NET unknown        | liver, bone        | Y-90     | 23.3 / 6      | 78 | 13.1 | 25.6 | PD |

| primary                                     |   |    |                    |                         |        |             |     |      |      |    |
|---------------------------------------------|---|----|--------------------|-------------------------|--------|-------------|-----|------|------|----|
| 26                                          | m | 62 | NET of small bowel | lymph node              | Y-90   | 11.1 / 4    | 69  | 23.8 | 21.9 | SD |
| 27                                          | m | 58 | NET of small bowel | liver, bone, lymph node | Y-90   | 11.3 / 5    | 108 | 34.2 | 39.9 | SD |
| 28                                          | m | 61 | NET of lung        | lung, lymph node        | Lu-177 | 23.6 / 3    | 93  | 18.0 | 9.0  | MR |
| Dendritic reticulum craniopharyngeal, lymph |   |    |                    |                         |        |             |     |      |      |    |
| 29                                          | m | 44 | cell sarcoma       | node, bone              | Lu-177 | 24.9 / 4    | 120 | 31.2 | 21.7 | SD |
| 30                                          | f | 63 | NET of pancreas    | liver                   | Y-90   | 12.9 / 5    | 91  | 33.2 | 31.8 | PD |
| 31                                          | m | 67 | NET of rectum      | liver                   | Lu-177 | 30.15 / 4   | 42  | 45.5 | 6.8  | CR |
| 32                                          | f | 62 | NET of small bowel | bone, lymph node        | Lu-177 | 22.66 / 4   | 75  | 24.3 | 26.3 | SD |
| liver, lung, bone, lymph                    |   |    |                    |                         |        |             |     |      |      |    |
| 33                                          | m | 50 | NET of small bowel | node                    | Lu-177 | 29.3 / 4    | 48  | 34.7 | 28.8 | SD |
| 34                                          | f | 49 | NET of rectum      | liver, lymph node       | Lu-    | 8.05+14.6 / | 73  | 52.5 | n.a. | PR |

|    |   |    |                    |                         | 177+Y-90 | 1+4       |     |      |      |    |
|----|---|----|--------------------|-------------------------|----------|-----------|-----|------|------|----|
| 35 | m | 57 | NET of small bowel | liver, bone, lymph node | Lu-177   | 23.98 / 4 | 47  | 30.5 | 18.5 | SD |
| 36 | f | 47 | NET of pancreas    | liver                   | Lu-177   | 29.42 / 4 | 90  | 20.8 | 27.0 | SD |
| 37 | m | 82 | NET of small bowel | liver, lymph node       | Y-90     | 10.55 / 5 | 63  | 34.0 | 10.6 | PR |
| 38 | m | 47 | NET of small bowel | liver, lymph node, lung | Lu-177   | 27.86 / 4 | 57  | 6.5  | 9.6  | SD |
| 39 | m | 65 | NET of lung        | liver, bone             | Y-90     | 16.3 / 4  | 52  | 41.1 | 51.4 | PR |
| 40 | m | 39 | NET of pancreas    | liver, bone, lymph node | Y-90     | 4.2 / 2   | 57  | 20.5 | 26.2 | PD |
| 41 | f | 68 | Gastrinoma         | liver, lymph node       | Y-90     | 14.4 / 4  | 101 | 80.5 | 49.0 | PR |
| 42 | f | 64 | NET of pancreas    | liver, bone             | Lu-177   | 26 / 4    | 71  | 54.1 | 8.8  | SD |
|    |   |    | NET unknown        |                         |          |           |     |      |      |    |
| 43 | f | 51 | primary            | liver, bone             | Lu-177   | 30.55 / 5 | 68  | 27.3 | 27.4 | PR |

|    |   |    |                    |                         |        |           |    |       |      |    |
|----|---|----|--------------------|-------------------------|--------|-----------|----|-------|------|----|
| 44 | f | 45 | NET of small bowel | liver, bone, lymph node | Y-90   | 12.9 / 6  | 73 | 8.1   | 8.5  | MR |
| 45 | m | 47 | NET of small bowel | liver, lymph node       | Y-90   | 17.07 / 6 | 35 | 267.0 | 54.7 | MR |
| 46 | m | 59 | NET of pancreas    | lymph node              | Lu-177 | 24.58 / 4 | 80 | 6.8   | 9.8  | SD |

---

NET, neuroendocrine tumor

Lu-177, <sup>177</sup>Lu-DOTA-TATE; Y-90, <sup>90</sup>Y-DOTA-TOC

TCD, total cumulative dose (GBq), in parentheses number of cycles

Time interval between last therapy and restaging

Results according to the reference standard: MR, minor response; PR, partial response; CR, complete response; SD, stable disease; PD, progressive disease
